# Supplementary material for: A Two-Compartment Fermentation System to Quantify Strain-Specific Interactions in Microbial Co-Cultures
Source: MDPI journal article supplement (doi:10.3390/bioengineering10010103), 2023-01-11
Supplement: s1 [file s1]

Article

# A Two-Compartment Fermentation System to Quantify Strain-Specific Interactions in Microbial Co-Cultures

Andreas Ulmer <sup>1</sup>, Stefan Veit <sup>1</sup>, Florian Erdemann <sup>1</sup>, Andreas Freund <sup>1</sup>, Maren Loesch <sup>1</sup>, Attila Teleki <sup>1</sup>, Ahmad A. Zeidan <sup>2</sup> and Ralf Takors <sup>1,\*</sup>

<sup>1</sup> Institute of Biochemical Engineering, University of Stuttgart, 70569 Stuttgart, Germany

<sup>2</sup> Systems Biology, R&D Discovery, Chr. Hansen A/S, 2970 Hørsholm, Denmark

\* Correspondence: takors@ibvt.uni-stuttgart.de

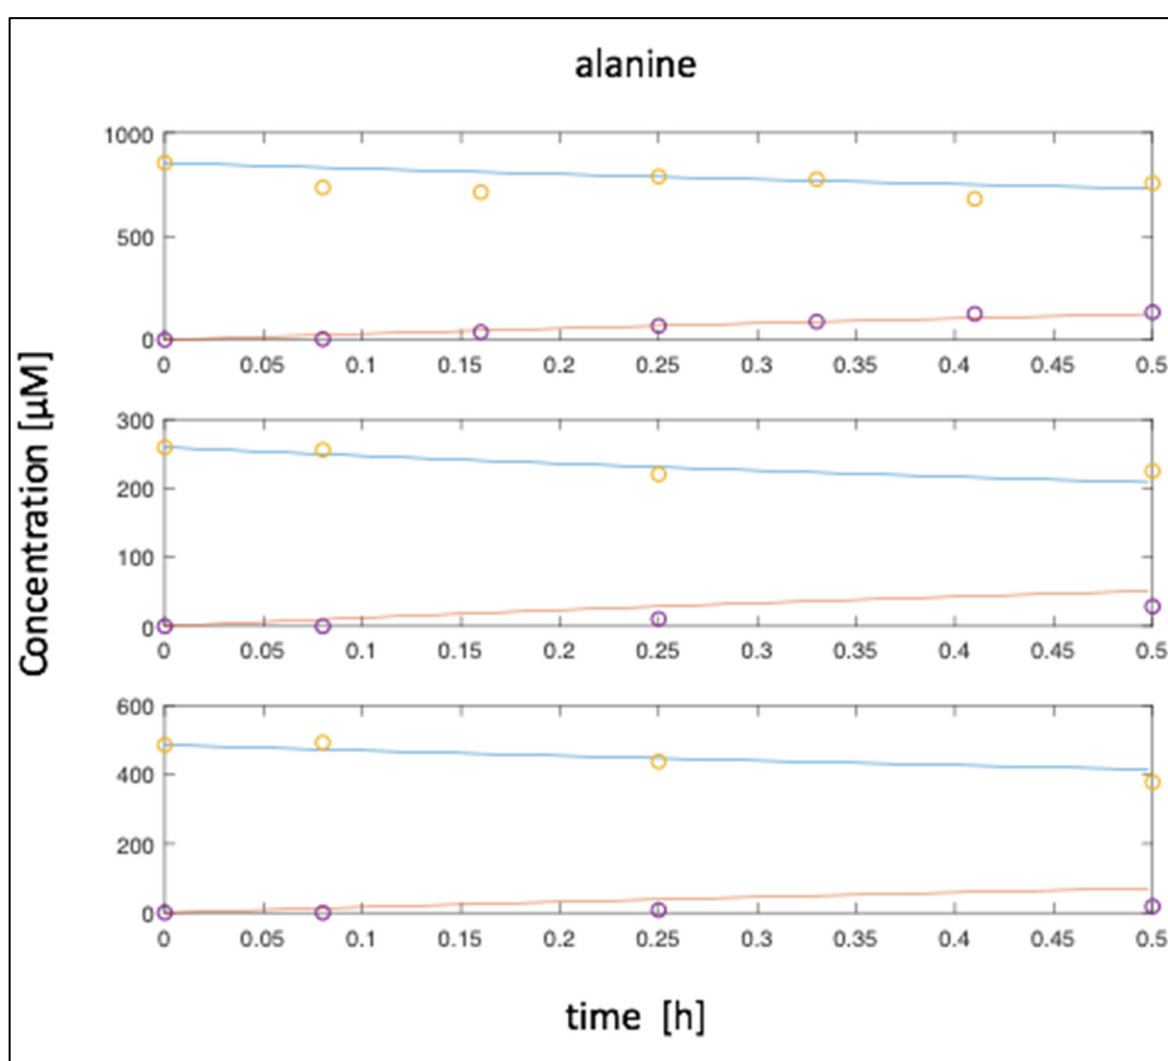

**Figure S1.** Alanine concentrations are measured to determine the transport coefficient  $k_{alanine}$  (purple circles: amino acid concentrations in compartment 1; orange circles: amino acid concentrations compartment 2). The process model was implemented in Matlab® and  $k_{alanine}$  was optimized. Lines: Simulated alanine concentrations based on initial alanine concentration at  $t = 0$  hours and estimated  $k_{alanine} = 0.34 \text{ h}^{-1}$  for three independent experiments with different initial alanine concentrations.

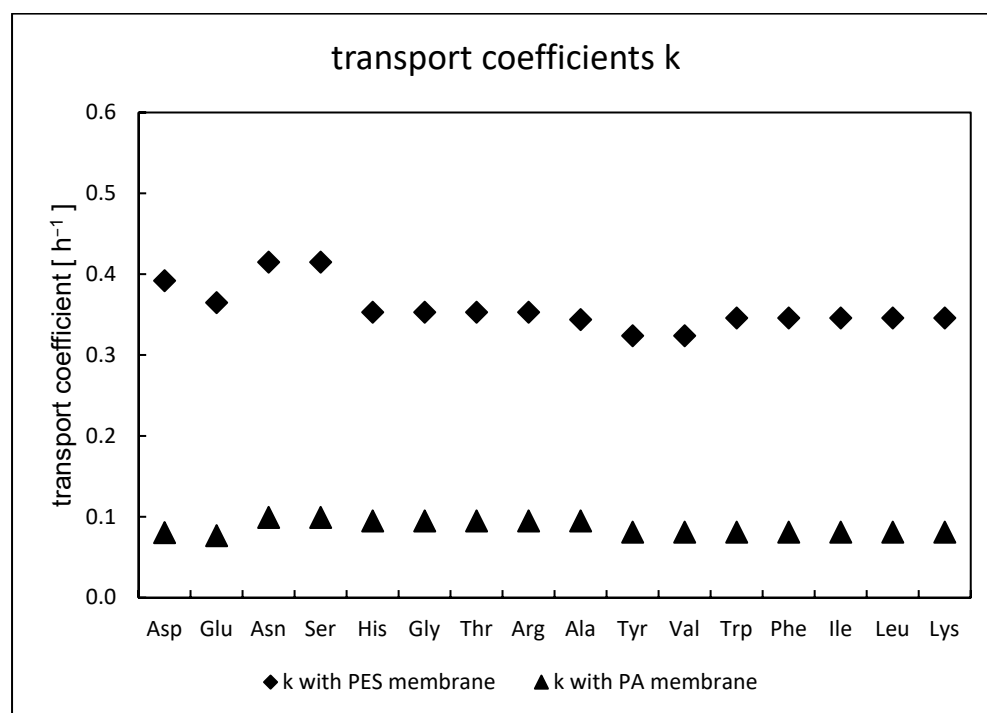

**Figure S2.** Amino acid transport coefficients  $k_i$  estimated for the membrane unit with an integrated PES (rhomb) or PA (triangle) membrane, attached to the vessel bioreactor system.

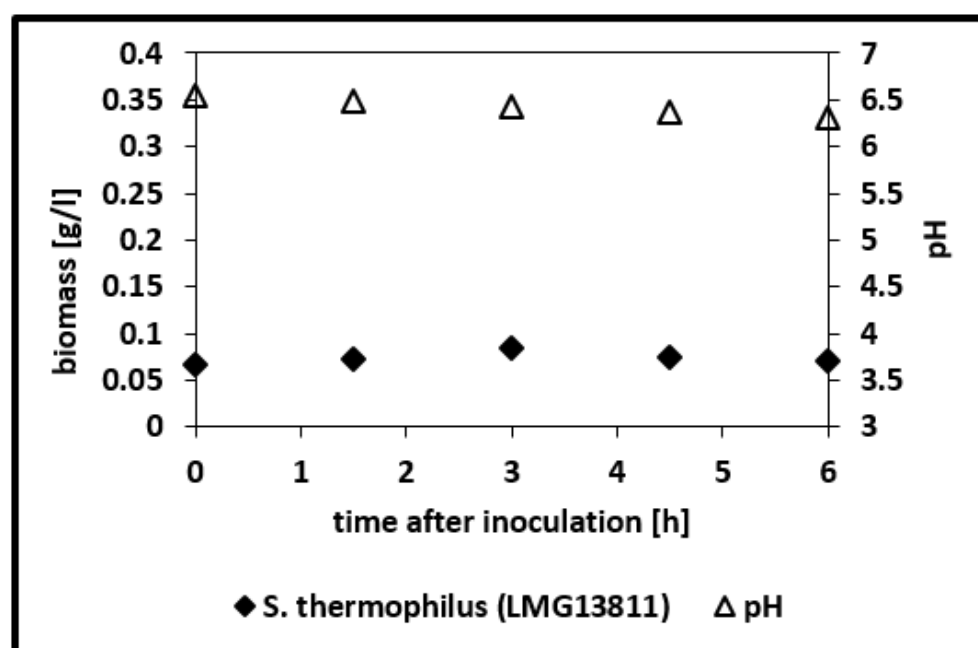

**Figure S3.** Cultivation of *S. thermophilus* in a crimp-top serum bottle containing synthetic medium with casein and lactose. Biomass was monitored by flow cytometry (rhomb).

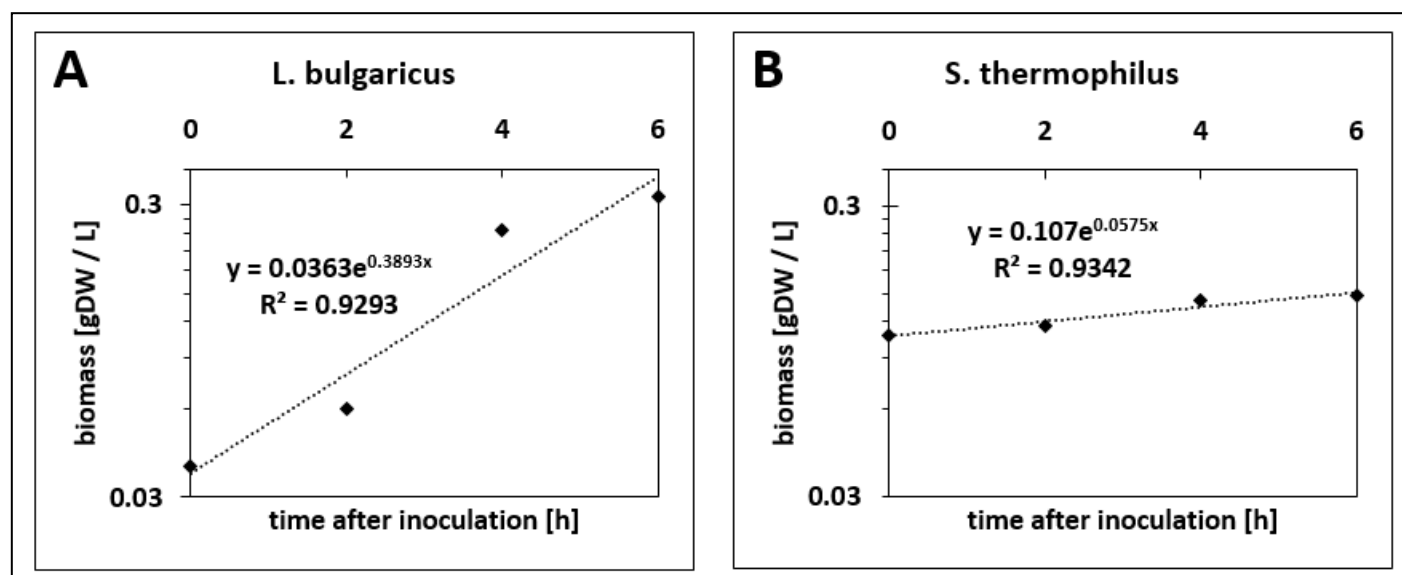

**Figure S4.** Growth of *L. bulgaricus* (A) and *S. thermophilus* (B) in vessel bioreactor system. The *S. thermophilus*-compartment was filled with SM + lactose, and the *L. bulgaricus*-compartment was filled with SMcas + lactose. Samples were analysed by flow cytometry to calculate biomass. Growth rates were calculated from zero to six hours:  $\mu$  (*S. thermophilus*) = 0.06 h<sup>-1</sup> and  $\mu$  (*L. bulgaricus*) = 0.39 h<sup>-1</sup>.

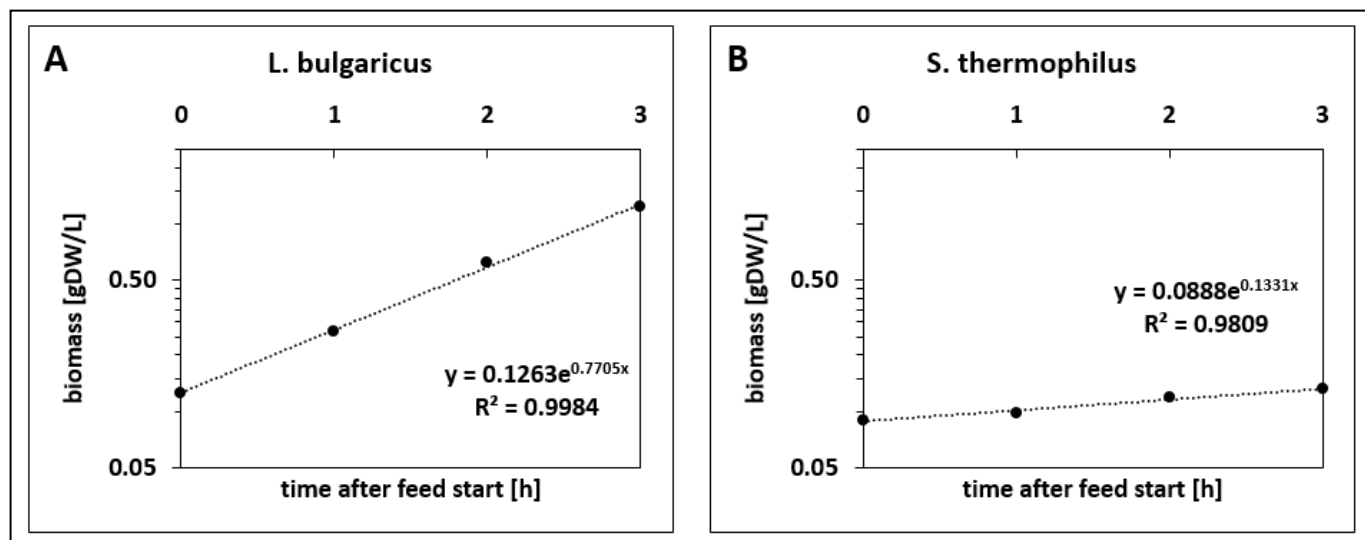

**Figure S5.** Growth rate of *L. bulgaricus* (A) and *S. thermophilus* (B) in tube-bioreactor-system. The *S. thermophilus*-compartment was filled with SM + lactose, and the *L. bulgaricus*-compartment was filled with SMcas + lactose. Samples were analysed by flow cytometry to calculate biomass. The dilution rate for each compartment was  $D = 0.14$  h<sup>-1</sup>. This results in  $\mu$  (*L. bulgaricus*) = 0.77 h<sup>-1</sup> + 0.14 h<sup>-1</sup> = 0.91 h<sup>-1</sup>, and  $\mu$  (*S. thermophilus*) = 0.13 h<sup>-1</sup> + 0.14 h<sup>-1</sup> = 0.27 h<sup>-1</sup>.

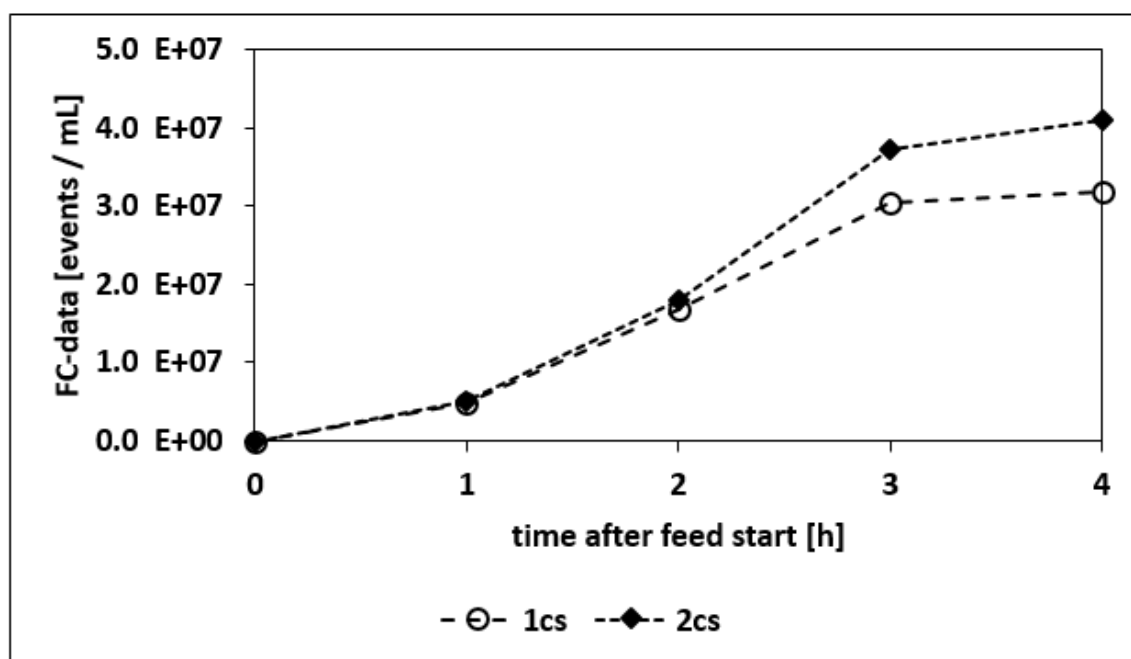

**Figure S6.** (open circles) Cell events of a co-culture grown in a crimp-top serum bottle measured by flow cytometry. (filled rhomb) The biomass in each compartment of a tube-bioreactor-system was analysed by flow cytometry and summed up. The initial FC-data ( $t = 0$  hour) were subtracted from all values to normalize and compare data sets.

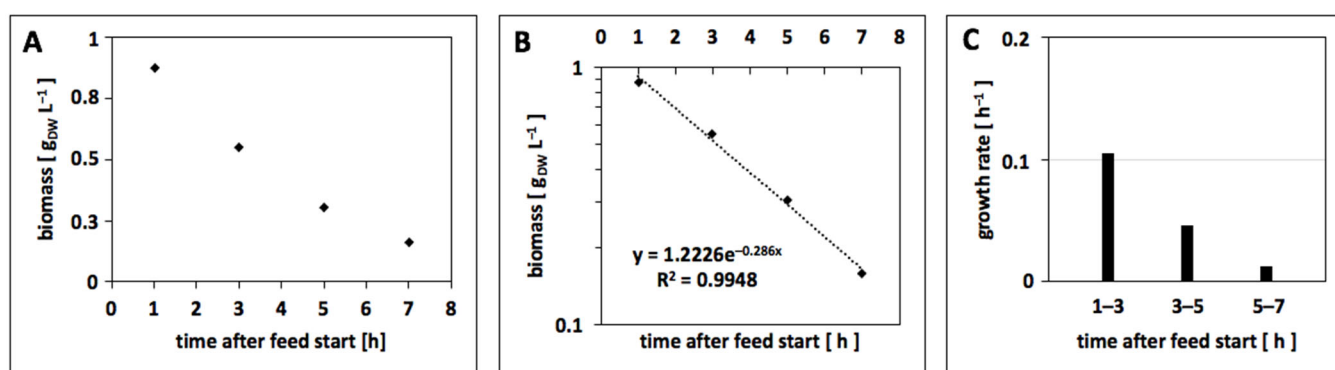

**Figure S7.** (A) Biomass of *S. thermophilus* in tube-bioreactor-system. The *S. thermophilus*-compartment was filled with SM + glucose, and the *L. bulgaricus*-compartment was filled with SMcas+glucose. Biomass in *S. thermophilus*-compartment was monitored by optical density. (B) Calculated growth rate  $\mu$  with a dilution rate of  $D = 0.34 h^{-1}$  results in  $\mu = (-0.29 h^{-1} + 0.34 h^{-1}) = 0.05 h^{-1}$ . (C) Calculated growth rate  $\mu$  for each time step.

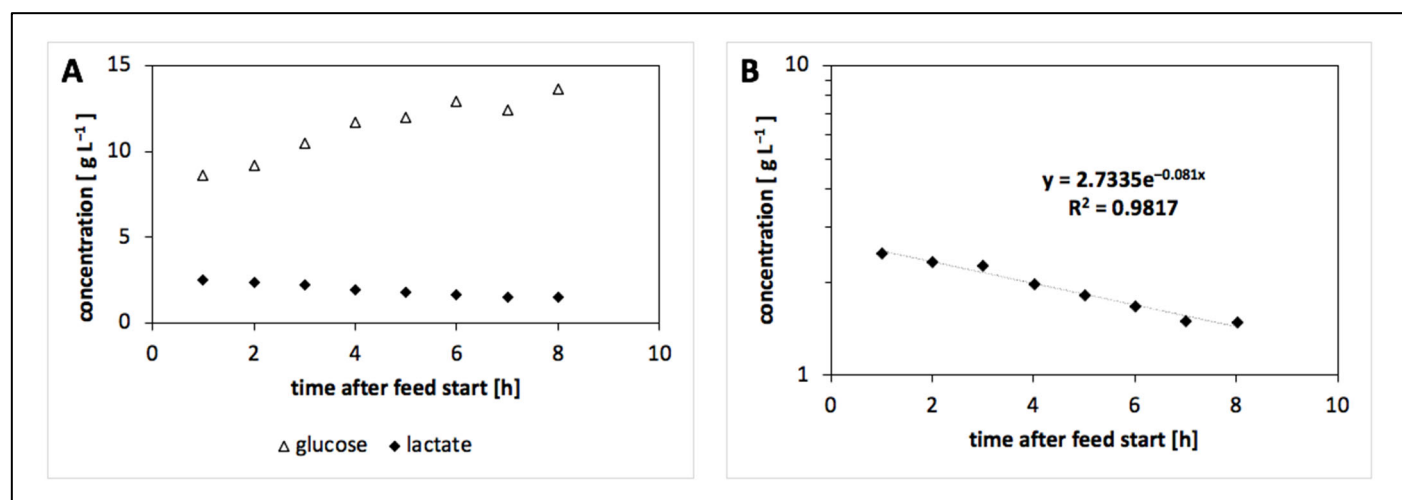

**Figure S8.** Glucose and lactate concentrations in *S. thermophilus*-compartment measured by HPLC. (A) Strains were cultivated in tube-bioreactor-system filled with SMcas+glucose in the *L. bulgaricus*-compartment ( $D = 0.07 \text{ h}^{-1}$ ) and SM+glucose in the *S. thermophilus*-compartment ( $D = 0.34 \text{ h}^{-1}$ ). (B) Lactate production rate in *S. thermophilus*-compartment (considering  $D = 0.34 \text{ h}^{-1}$ ):  $r = -0.08 \text{ h}^{-1} + 0.34 \text{ h}^{-1} = 0.26 \text{ h}^{-1}$ .

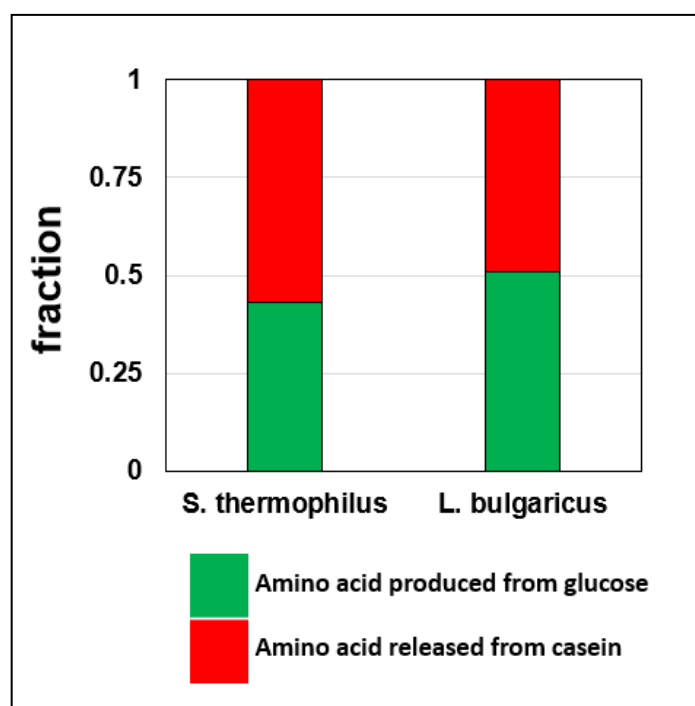

**Figure S9.** Fractions [mol/mol] of alanine isotopologues:  $m + 0$ ,  $m + 1$ , and  $m + 2$  were corrected for natural isotopologues. Fully <sup>13</sup>C labeled ( $m + 3$ ) alanine is shown in red. The green fraction indicates alanine hydrolysed from casein and the red fraction indicates alanine produced from glucose. Strains were cultivated in tube-bioreactor-system containing SMcas + <sup>13</sup>C glucose in the *L. bulgaricus*-compartment, and SM + <sup>13</sup>C glucose in the *S. thermophilus*-compartment. After 24 hours, intracellular metabolites were analysed from strains in each compartment by LC-MS/MS.

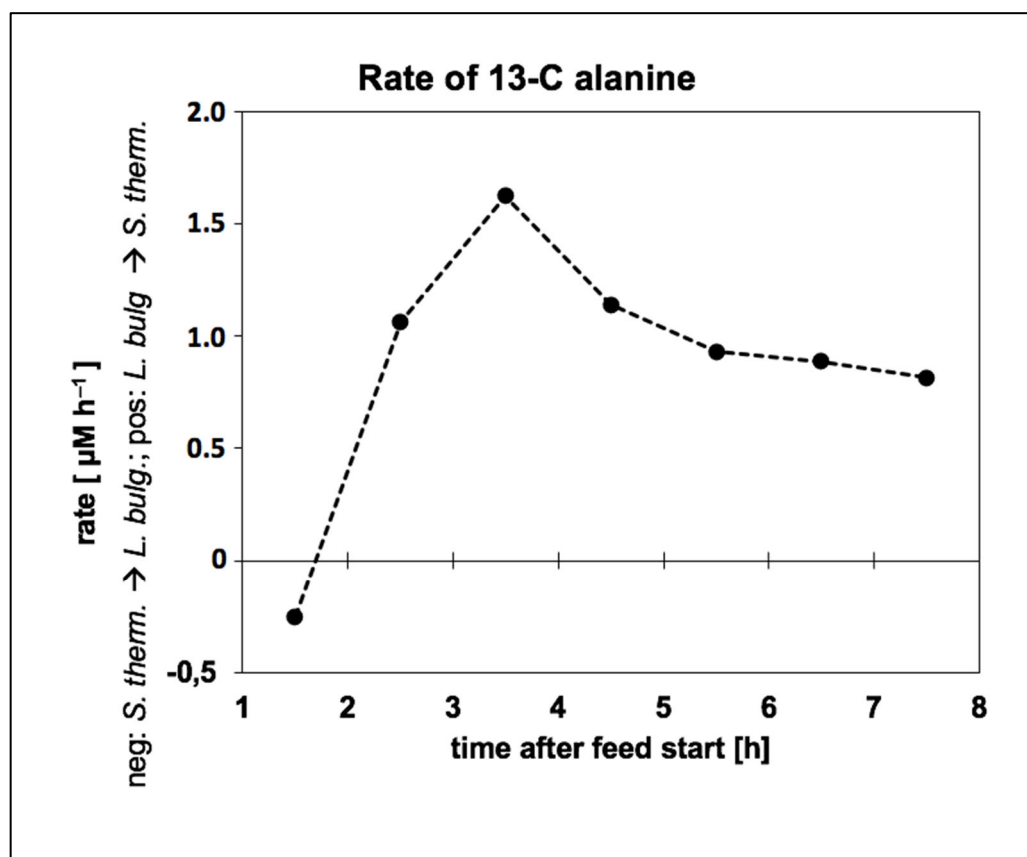

**Figure S10.** Diffusion rate of 13-C alanine across the membrane in tube-bioreactor-system filled with *L. bulgaricus* and *S. thermophilus*. Negative rates: diffusion from *S. thermophilus*-compartment to *L. bulgaricus*-compartment. Positive rates: diffusion from *L. bulgaricus*-compartment to *S. thermophilus*-compartment.

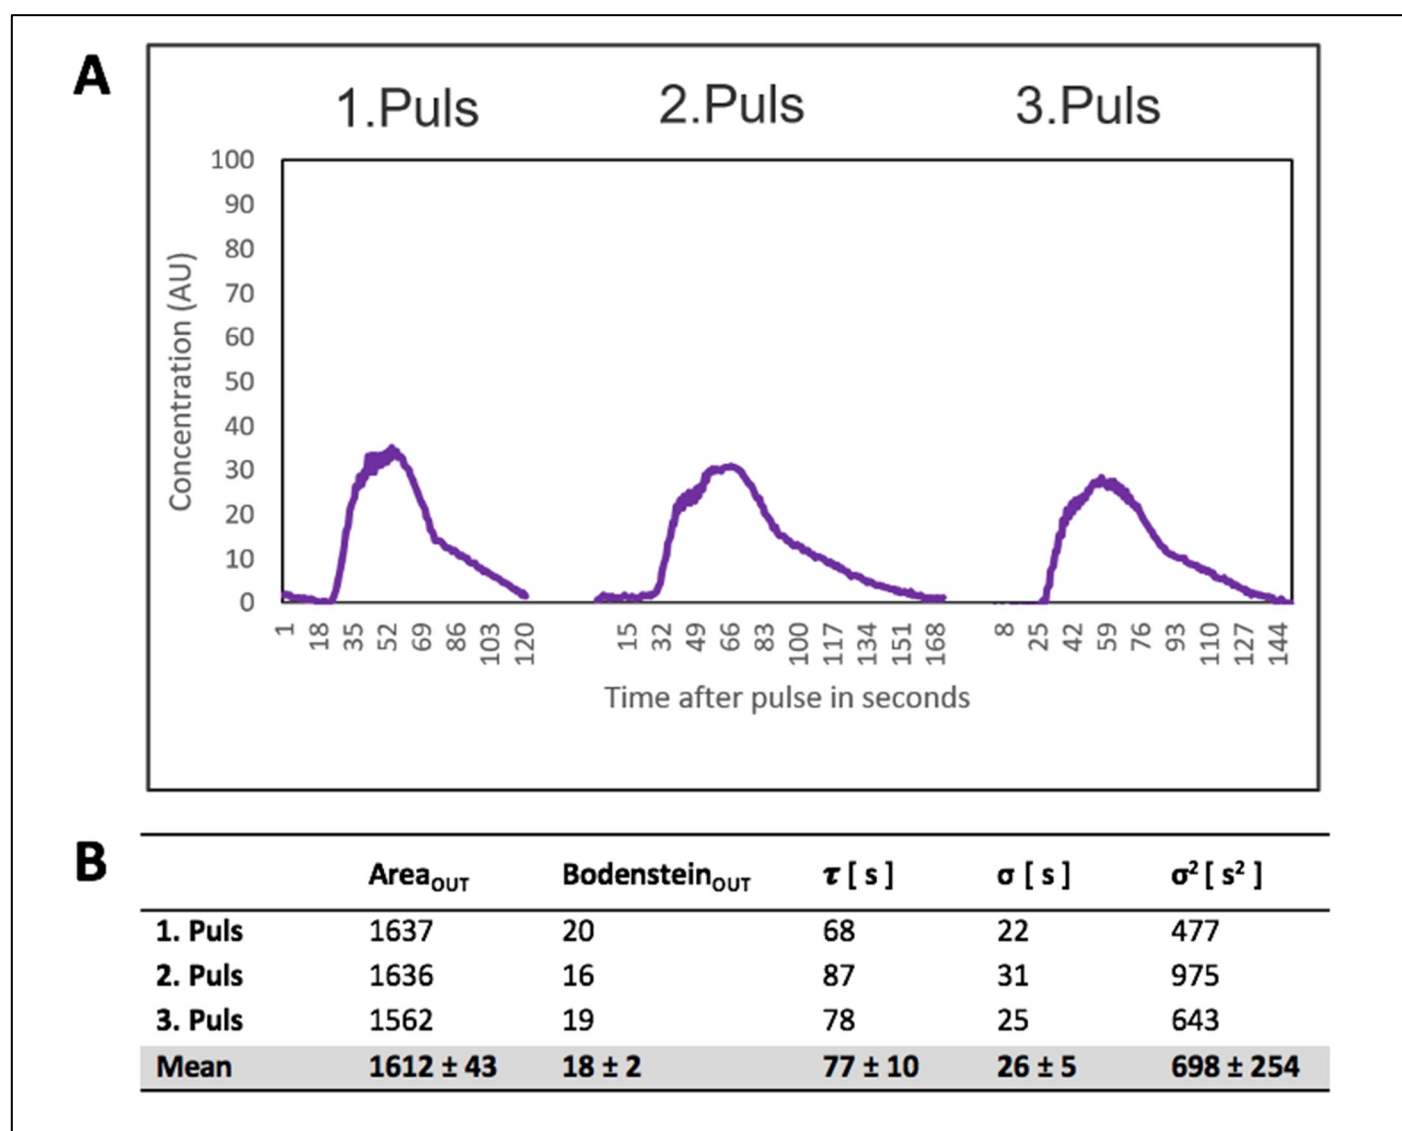

**Figure S11.** (A)  $r$ -values at the outlet of the membrane unit (violet curve). Change of the  $r$ -values was induced by a hydrochloric acid pulse at zero second. Three pulses were recorded to calculate the Bodenstein number in the membrane unit. (B) Calculated numbers to determine the Bodenstein number.

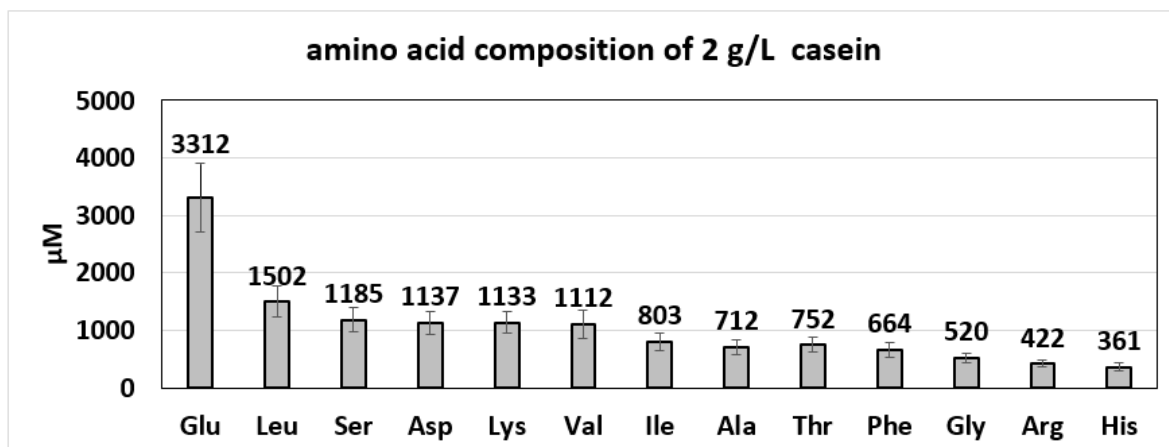

**Figure S12.** Amino acid composition of casein. 2 g/L casein was hydrolysed with HCL and amino acid concentrations were measured by HPLC. Numbers on top of each bar indicate exact concentration.



**Table S1.** Composition of the synthetic medium (SM). The SM contains all listed compounds, except amino acids or casein, and glucose or lactose, respectively.

| Category       | Compound                                  | Concentration<br>[g L <sup>-1</sup> ] | CAS Number |
|----------------|-------------------------------------------|---------------------------------------|------------|
|                | Di-potassium hydrogen phosphate           | 2.5                                   | 7758-11-4  |
|                | Potassium dihydrogen phosphate            | 3                                     | 7778-77-0  |
|                | Sodium acetate                            | 1                                     | 127-09-3   |
|                | Ammonium citrate tribasic                 | 0.6                                   | 3458-72-8  |
|                | Manganese sulfate monohydrate             | 0.02                                  | 10034-96-5 |
|                | Iron(II) sulfate heptahydrate             | 0.00132                               | 7782-63-0  |
|                | Calcium chloride dihydrate                | 0.08745                               | 10035-04-8 |
|                | Tween 80                                  | 1 mL/L                                | 9005-65-6  |
|                | D-Lactose monohydrate                     | 15.75                                 | 10039-26-6 |
|                | Glucose monohydrate                       | 15.75                                 | 14431-43-7 |
|                | Magnesium sulfate heptahydrate            | 0.2                                   | 10034-99-8 |
|                | Urea                                      | 0.12                                  | 57-13-6    |
| nucleobases    | Adenine                                   | 0.01                                  | 73-24-5    |
|                | Guanine                                   | 0.01                                  | 73-40-5    |
|                | Uracil                                    | 0.01                                  | 66-22-8    |
|                | Xanthine                                  | 0.01                                  | 69-89-6    |
| vitamins       | Biotin                                    | 0.0002                                | 58-85-5    |
|                | Folic acid                                | 0.0002                                | 59-30-3    |
|                | Pyridoxal hydrochloride                   | 0.001                                 | 65-22-5    |
|                | Riboflavin                                | 0.0005                                | 83-88-5    |
|                | Thiamine chloride hydrochloride           | 0.0005                                | 67-03-8    |
|                | Nicotinamide                              | 0.0005                                | 98-92-0    |
|                | Cyanocobalamin                            | 0.0005                                | 68-19-9    |
|                | 4-Aminobenzoic acid                       | 0.0005                                | 150-13-0   |
|                | D-Pantothenic acid hemicalcium salt       | 0.004                                 | 137-08-6   |
|                | DL-6,8-thioctic acid                      | 0.0005                                | 1077-28-7  |
| trace elements | Ammonium molybdate tetrahydrate           | 0.0000037                             | 12054-85-2 |
|                | Cobalt(II) chloride hexahydrate           | 0.000007                              | 7791-13-1  |
|                | Boric acid                                | 0.000025                              | 10043-35-3 |
|                | Copper(II) sulfate pentahydrate           | 0.0000025                             | 7758-99-8  |
|                | Zinc sulfate heptahydrate                 | 0.0000029                             | 7446-20-0  |
| amino acids    | L-Alanine                                 | 0.1                                   | 56-41-7    |
|                | L-Arginine                                | 0.317                                 | 74-79-3    |
|                | L-Asparagine monohydrate                  | 0.343                                 | 5794-13-8  |
|                | L-Aspartic acid                           | 0.499                                 | 56-84-8    |
|                | L-Cysteine hydrochloride monohydrate      | 0.3                                   | 7048-04-6  |
|                | L-Glutamic acid                           | 0.331                                 | 56-86-0    |
|                | L-Glutamine                               | 0.29                                  | 56-85-9    |
|                | Glycine                                   | 0.16                                  | 56-40-6    |
|                | L-Histidine monohydrochloride monohydrate | 0.273                                 | 5934-29-2  |
|                | L-Isoleucine                              | 0.361                                 | 73-32-5    |

|        |                 |       |           |
|--------|-----------------|-------|-----------|
|        | L-Leucine       | 0.6   | 61-90-5   |
|        | L-Lysine        | 0.351 | 56-87-1   |
|        | L-Methionine    | 0.119 | 63-68-3   |
|        | L-Phenylalanine | 0.34  | 63-91-2   |
|        | L-Proline       | 0.921 | 147-85-3  |
|        | L-Serine        | 0.359 | 56-45-1   |
|        | L-Threonine     | 0.3   | 72-19-5   |
|        | L-Tryptophan    | 0.102 | 73-22-3   |
|        | L-Tyrosine      | 0.12  | 60-18-4   |
|        | L-Valine        | 0.468 | 72-18-4   |
| casein | Casein          | 2     | 9005-46-3 |

[illegible][illegible]

|                        |   |      |      |     |      |     |      |      |     |     |     |      |     |     |      |      |      |
|------------------------|---|------|------|-----|------|-----|------|------|-----|-----|-----|------|-----|-----|------|------|------|
|                        | 0 | 4    | 1    | 0   | 5    | 0   | 3    | 0    | 0   | 0   | 0   | 6    | 0   | 1   | 2    | 6    | 0    |
|                        | 0 | 52   | 28   | 18  | 42   | 13  | 26   | 28   | 18  | 11  | 2   | 47   | 3   | 23  | 32   | 54   | 22   |
|                        | 1 | 122  | 67   | 44  | 97   | 33  | 59   | 67   | 44  | 29  | 14  | 105  | 11  | 53  | 73   | 121  | 57   |
| PES<br>Expt.3<br>comp1 | 0 | 1805 | 1063 | 688 | 1548 | 541 | 1076 | 1063 | 778 | 486 | 279 | 1523 | 214 | 834 | 1143 | 1938 | 999  |
|                        | 0 | 1874 | 1087 | 701 | 1557 | 546 | 1034 | 1084 | 785 | 493 | 284 | 1564 | 217 | 842 | 1164 | 1945 | 1003 |
|                        | 0 | 1648 | 961  | 626 | 1365 | 488 | 915  | 959  | 699 | 438 | 248 | 1399 | 192 | 752 | 1048 | 1748 | 896  |
|                        | 1 | 1458 | 835  | 545 | 1174 | 421 | 741  | 846  | 599 | 379 | 216 | 1277 | 169 | 657 | 914  | 1498 | 776  |
| PES<br>Expt.3<br>comp2 | 0 | 0    | 0    | 0   | 0    | 0   | 0    | 0    | 0   | 0   | 0   | 0    | 0   | 0   | 0    | 0    | 0    |
|                        | 0 | 6    | 2    | 0   | 6    | 0   | 3    | 1    | 0   | 0   | 0   | 6    | 0   | 1   | 2    | 6    | 0    |
|                        | 0 | 40   | 20   | 13  | 33   | 9   | 22   | 21   | 10  | 8   | 2   | 35   | 0   | 15  | 22   | 38   | 14   |
|                        | 1 | 79   | 40   | 28  | 65   | 18  | 43   | 43   | 23  | 18  | 7   | 65   | 5   | 32  | 44   | 74   | 31   |
| PA<br>Expt.1<br>comp1  | 0 | 1089 | 628  | 419 | 877  | 320 | 555  | 628  | 456 | 280 | 162 | 952  | 131 | 510 | 685  | 1129 | 598  |
|                        | 0 | 1030 | 590  | 385 | 842  | 296 | 541  | 593  | 426 | 266 | 150 | 877  | 119 | 468 | 639  | 1072 | 555  |
|                        | 0 | 1238 | 724  | 386 | 1219 | 302 | 779  | 723  | 522 | 329 | 188 | 1146 | 147 | 566 | 778  | 1306 | 546  |
|                        | 1 | 1141 | 666  | 366 | 1095 | 282 | 679  | 666  | 484 | 299 | 175 | 1111 | 138 | 534 | 724  | 1195 | 507  |
| PA<br>Expt. 1<br>comp2 | 0 | 2    | 1    | 0   | 1    | 0   | 1    | 0    | 0   | 0   | 0   | 11   | 3   | 2   | 1    | 2    | 0    |
|                        | 0 | 12   | 7    | 4   | 11   | 2   | 8    | 7    | 4   | 3   | 2   | 20   | 1   | 7   | 8    | 12   | 4    |
|                        | 0 | 36   | 20   | 12  | 35   | 8   | 23   | 21   | 12  | 10  | 5   | 41   | 4   | 17  | 22   | 35   | 13   |
|                        | 1 | 72   | 39   | 23  | 69   | 16  | 46   | 41   | 24  | 19  | 10  | 73   | 7   | 32  | 42   | 68   | 26   |
| PA<br>Expt. 2<br>comp1 | 0 | 2043 | 1226 | 652 | 2190 | 520 | 1556 | 1236 | 910 | 573 | 317 | 1913 | 248 | 963 | 1313 | 2293 | 964  |

|               |   |      |      |     |      |     |      |      |      |     |     |      |     |      |      |      |      |
|---------------|---|------|------|-----|------|-----|------|------|------|-----|-----|------|-----|------|------|------|------|
|               | 0 | 1933 | 1156 | 618 | 2047 | 490 | 1425 | 1163 | 859  | 535 | 299 | 1784 | 238 | 915  | 1233 | 2146 | 921  |
|               | 0 | 1807 | 1075 | 567 | 1902 | 450 | 1303 | 1082 | 788  | 497 | 277 | 1658 | 217 | 837  | 1145 | 1989 | 842  |
|               | 1 | 1635 | 968  | 521 | 1698 | 411 | 1149 | 977  | 718  | 446 | 252 | 1512 | 203 | 777  | 1042 | 1792 | 775  |
| <b>PA</b>     | 0 | 3    | 1    | 0   | 2    | 0   | 1    | 1    | 1    | 1   | 0   | 12   | 3   | 2    | 2    | 3    | 1    |
| <b>Expt.2</b> |   |      |      |     |      |     |      |      |      |     |     |      |     |      |      |      |      |
| <b>comp2</b>  |   |      |      |     |      |     |      |      |      |     |     |      |     |      |      |      |      |
|               | 0 | 8    | 4    | 3   | 8    | 2   | 6    | 4    | 0    | 3   | 1   | 17   | 3   | 1    | 5    | 8    | 3    |
|               | 0 | 14   | 7    | 4   | 13   | 3   | 10   | 7    | 4    | 4   | 2   | 20   | 1   | 6    | 8    | 12   | 3    |
|               | 1 | 19   | 10   | 6   | 19   | 4   | 15   | 10   | 5    | 5   | 3   | 25   | 2   | 8    | 10   | 16   | 5    |
| <b>PA</b>     | 0 | 3132 | 1918 | 985 | 3714 | 805 | 3117 | 1935 | 1454 | 914 | 471 | 2896 | 371 | 1454 | 1991 | 3680 | 1536 |
| <b>Expt.3</b> |   |      |      |     |      |     |      |      |      |     |     |      |     |      |      |      |      |
| <b>comp1</b>  |   |      |      |     |      |     |      |      |      |     |     |      |     |      |      |      |      |
|               | 0 | 2917 | 1779 | 920 | 3368 | 746 | 2699 | 1789 | 1343 | 841 | 444 | 2664 | 349 | 1362 | 1855 | 3384 | 1425 |
|               | 0 | 2697 | 1636 | 843 | 3085 | 684 | 2439 | 1644 | 1228 | 773 | 407 | 2473 | 318 | 1247 | 1707 | 3107 | 1300 |
|               | 1 | 2668 | 1616 | 828 | 3030 | 671 | 2344 | 1623 | 1203 | 757 | 415 | 2445 | 313 | 1227 | 1683 | 3073 | 1281 |
| <b>PA</b>     | 0 | 8    | 2    | 1   | 3    | 0   | 1    | 2    | 1    | 1   | 1   | 12   | 3   | 2    | 3    | 3    | 1    |
| <b>Expt.3</b> |   |      |      |     |      |     |      |      |      |     |     |      |     |      |      |      |      |
| <b>comp2</b>  |   |      |      |     |      |     |      |      |      |     |     |      |     |      |      |      |      |
|               | 0 | 26   | 14   | 9   | 26   | 7   | 18   | 15   | 10   | 7   | 4   | 34   | 3   | 13   | 17   | 26   | 11   |
|               | 0 | 69   | 38   | 25  | 75   | 18  | 53   | 43   | 30   | 21  | 10  | 78   | 7   | 34   | 46   | 74   | 32   |
|               | 1 | 138  | 77   | 50  | 151  | 36  | 105  | 87   | 59   | 42  | 20  | 146  | 18  | 66   | 91   | 147  | 62   |
|               | 0 | 2768 | 1962 | 922 | 3088 | 73  | 2411 | 1663 | 1264 | 780 | 435 | 2531 | 335 | 1322 | 1781 | 3182 | 1300 |
|               | 2 | 2512 | 1762 | 818 | 2682 | 67  | 1903 | 1508 | 1142 | 681 | 408 | 2335 | 314 | 1231 | 1643 | 2881 | 1165 |
|               | 4 | 2408 | 1678 | 720 | 2481 | 65  | 1684 | 1411 | 1080 | 602 | 381 | 2173 | 296 | 1148 | 1534 | 2697 | 1115 |
|               | 0 | 7    | 3    | 1   | 4    | 0   | 4    | 2    | 4    | 4   | 1   | 17   | 2   | 2    | 3    | 4    | 2    |
|               | 2 | 613  | 293  | 4   | 660  | 8   | 427  | 406  | 238  | 82  | 83  | 587  | 74  | 300  | 378  | 657  | 227  |
|               | 4 | 1011 | 483  | 47  | 1049 | 9   | 673  | 688  | 392  | 107 | 137 | 953  | 122 | 499  | 613  | 1074 | 368  |

**Table S3.** Amino acid concentrations ( $\mu\text{M}$ ) in *S. thermophilus*-compartment and *L. bulgaricus*-compartment cultivated in tube-bioreactor-system analysed by LC-MS/MS.

| sample                       | time after feed start | glycine       | alanine       | serine        | proline       | valine        | leucine       | isoleucine    | tyrosine      | asparagine    | threonine     | lysine        | glutamate     | methionine    | phenylalanine | arginine      | tryptophan    |
|------------------------------|-----------------------|---------------|---------------|---------------|---------------|---------------|---------------|---------------|---------------|---------------|---------------|---------------|---------------|---------------|---------------|---------------|---------------|
| $\mu\text{M}$                | hour                  | $\mu\text{M}$ |
| <i>S. therm.</i> compartment | 1                     | 68            | 9             | 124           | 708           | 206           | 386           | 115           | 59            | 34            | 152           | 124           | 40            | 10            | 109           | 140           | 21            |
| <i>S. therm.</i> compartment | 2                     | 57            | 9             | 101           | 677           | 188           | 366           | 100           | 53            | 24            | 137           | 110           | 27            | 5             | 98            | 130           | 18            |
| <i>S. therm.</i> compartment | 3                     | 49            | 6             | 75            | 613           | 153           | 321           | 80            | 43            | 19            | 102           | 86            | 21            | 1             | 79            | 113           | 13            |
| <i>S. therm.</i> compartment | 4                     | 38            | 4             | 57            | 559           | 125           | 281           | 62            | 37            | 13            | 74            | 62            | 19            | 0             | 65            | 96            | 10            |
| <i>S. therm.</i> compartment | 5                     | 40            | 4             | 49            | 522           | 106           | 249           | 50            | 33            | 11            | 56            | 54            | 17            | 0             | 54            | 87            | 8             |
| <i>S. therm.</i> compartment | 6                     | 26            | 3             | 39            | 482           | 80            | 197           | 34            | 27            | 8             | 38            | 40            | 14            | 0             | 39            | 72            | 6             |
| <i>S. therm.</i> compartment | 7                     | 30            | 3             | 34            | 439           | 66            | 165           | 25            | 25            | 7             | 25            | 31            | 12            | 0             | 32            | 64            | 5             |
| <i>S. therm.</i> compartment | 8                     | 31            | 4             | 29            | 388           | 52            | 129           | 18            | 21            | 6             | 18            | 26            | 9             | 0             | 22            | 56            | 4             |
|                              |                       |               |               |               |               |               |               |               |               |               |               |               |               |               |               |               |               |
| <i>L. bulg.</i> compartment  | 1                     | 26            | 4             | 39            | 358           | 66            | 166           | 33            | 18            | 11            | 36            | 48            | 17            | 4             | 30            | 73            | 5             |
| <i>L. bulg.</i> compartment  | 2                     | 42            | 11            | 81            | 562           | 142           | 299           | 77            | 42            | 32            | 82            | 89            | 49            | 1             | 69            | 116           | 13            |

|                                |   |    |    |     |     |     |     |     |    |    |     |     |    |   |    |     |    |
|--------------------------------|---|----|----|-----|-----|-----|-----|-----|----|----|-----|-----|----|---|----|-----|----|
| <i>L. bulg.</i><br>compartment | 3 | 58 | 17 | 111 | 675 | 192 | 368 | 107 | 64 | 34 | 113 | 114 | 63 | 0 | 96 | 131 | 18 |
| <i>L. bulg.</i><br>compartment | 4 | 62 | 12 | 91  | 639 | 169 | 340 | 91  | 56 | 24 | 94  | 100 | 45 | 0 | 85 | 121 | 15 |
| <i>L. bulg.</i><br>compartment | 5 | 48 | 9  | 71  | 587 | 138 | 297 | 70  | 47 | 17 | 68  | 78  | 31 | 0 | 67 | 104 | 12 |
| <i>L. bulg.</i><br>compartment | 6 | 52 | 9  | 60  | 551 | 115 | 261 | 54  | 41 | 13 | 47  | 61  | 24 | 0 | 52 | 94  | 10 |
| <i>L. bulg.</i><br>compartment | 7 | 46 | 8  | 49  | 492 | 87  | 209 | 36  | 33 | 10 | 27  | 43  | 17 | 0 | 34 | 77  | 7  |
| <i>L. bulg.</i><br>compartment | 8 | 39 | 8  | 41  | 458 | 75  | 173 | 26  | 30 | 8  | 16  | 32  | 15 | 0 | 24 | 68  | 7  |

**Code S1:** Determination of amino acid transport coefficient by least-square estimate in Matlab®.

```

% this code was written to determine the transport coefficient ki based on amino acid experiments
clear
error_best = 10000000;
load('data_for_k_PES.mat'); % amino acid concentrations
% Column Amino Acid
% Asp Glu Asn Ser His Gly Thr Arg Ala Tyr Val Trp Phe Ile Leu Lys
for col = 1:1:16;
data_for_k_one_aa = data_for_k(:,col);
for i = 0.2:0.001:0.5 % change ki
parameters = i;
% Time
time_delta = 0.083/10;
time_span = 0:time_delta:0.5; % in hours
%% FIRST EXPERIMENT
% initial conditions
c_aa_comp_1 = data_for_k_one_aa(1,1); % first expt
c_aa_comp_2 = 0;
c = [c_aa_comp_1 c_aa_comp_2];
% Integration
options = odeset('NonNegative',[1 2]);
f=@(t,x)balanceEquation(x,parameters);
[T1,Conc1] = ode45(f,time_span,c,options);
%% Second EXPERIMENT
% initial conditions
c_aa_comp_1 = data_for_k_one_aa(15,1); % first expt
c_aa_comp_2 = 0;
c = [c_aa_comp_1 c_aa_comp_2];
% Integration
options = odeset('NonNegative',[1 2]);
f=@(t,x)balanceEquation(x,parameters);
[T2,Conc2] = ode45(f,time_span,c,options);
%% Thirds EXPERIMENT
% initial conditions
c_aa_comp_1 = data_for_k_one_aa(23,1); % first expt
c_aa_comp_2 = 0;
c = [c_aa_comp_1 c_aa_comp_2];
% Integration
options = odeset('NonNegative',[1 2]);
f=@(t,x)balanceEquation(x,parameters);
[T3,Conc3] = ode45(f,time_span,c,options);

```



```

%% ERROR
error = abs(Conc1(11,2)- data_for_k_one_aa(9,1))+...
        abs(Conc1(21,2)- data_for_k_one_aa(10,1))+...
        abs(Conc1(31,2)- data_for_k_one_aa(11,1))+...
        abs(Conc1(41,2)- data_for_k_one_aa(12,1))+...
        abs(Conc1(51,2)- data_for_k_one_aa(13,1))+...
        abs(Conc1(61,2)- data_for_k_one_aa(14,1))+...
        abs(Conc2(11,2)- data_for_k_one_aa(20,1))+...
        abs(Conc2(31,2)- data_for_k_one_aa(21,1))+...
        abs(Conc2(61,2)- data_for_k_one_aa(22,1))+...
        abs(Conc3(11,2)- data_for_k_one_aa(28,1))+...
        abs(Conc3(31,2)- data_for_k_one_aa(29,1))+...
        abs(Conc3(61,2)- data_for_k_one_aa(30,1));
if error <= error_best
    error_best = error;
    k = parameters;
end
end
%% PLOT
% Integration
figure
subplot(3,1,1)
parameters = k ;
% initial conditions
c_aa_comp_1 = data_for_k_one_aa(1,1); % first expt
c_aa_comp_2 = 0;
c = [c_aa_comp_1 c_aa_comp_2];
% Integration
options = odeset('NonNegative',[1 2]);
f=@(t,x)balanceEquation(x,parameters);
[T1,Conc1] = ode45(f,time_span,c,options);
t_meas = [0 0.08 0.16 0.25 0.33 0.41 0.5];
c_meas_1_2 = data_for_k_one_aa(1:7,1);
c_meas_2_2 = data_for_k_one_aa(8:14,1);
plot(T1,Conc1)
hold on
scatter(t_meas,c_meas_1_2)
hold on
scatter(t_meas,c_meas_2_2)
% SEC EXPT
subplot(3,1,2)
parameters = k ;

```

```

% initial conditions
c_aa_comp_1 = data_for_k_one_aa(15,1); % first expt
c_aa_comp_2 = 0;
c = [c_aa_comp_1 c_aa_comp_2];
% Integration
options = odeset('NonNegative',[1 2]);
f=@(t,x)balanceEquation(x,parameters);
[T1,Conc1] = ode45(f,time_span,c,options);
t_meas = [0 0.08 0.25 0.5];
c_meas_1_3 = data_for_k_one_aa(15:18,1);
c_meas_2_3 = data_for_k_one_aa(19:22,1);
plot(T1,Conc1)
hold on
scatter(t_meas,c_meas_1_3)
hold on
scatter(t_meas,c_meas_2_3)
% THIRD EXPT
subplot(3,1,3)
parameters = k ;
% initial conditions
c_aa_comp_1 = data_for_k_one_aa(23,1); % first expt
c_aa_comp_2 = 0;
c = [c_aa_comp_1 c_aa_comp_2];
% Integration
options = odeset('NonNegative',[1 2]);
f=@(t,x)balanceEquation(x,parameters);
[T1,Conc3] = ode45(f,time_span,c,options);
t_meas = [0 0.08 0.25 0.5];
c_meas_1 = data_for_k_one_aa(23:26,1);
c_meas_2 = data_for_k_one_aa(27:30,1);
plot(T1,Conc3)
hold on
scatter(t_meas,c_meas_1)
hold on
scatter(t_meas,c_meas_2)
%%
k_total(col) = k;
end
%%
function dc_dt = balanceEquation(x0,parameters)
k = parameters(1);
dc_dt = zeros(2,1);

```

---

```
c_aa_comp_1 = x0(1);  
c_aa_comp_2 = x0(2);  
dc_dt(1) = k * (c_aa_comp_2 - c_aa_comp_1);  
dc_dt(2) = k * (c_aa_comp_1 - c_aa_comp_2);  
end
```
